# Supplementary material for: Salicylaldehyde-based molecular sensor with one facile step toward visual detection of viscosity
Source: Royal Society of Chemistry journal article supplement (doi:10.1039/d2sd00158f), 2022-11-17
Supplement: d2sd00158f1.pdf [file d2sd00158f1.pdf]

# Sensors & Diagnostics

## Electronic Supplementary Information

### Salicylaldehyde-based molecular sensor with one facile step toward visual detection of viscosity

Lingfeng Xu,<sup>1,2,\*</sup> Yuefeng Wang,<sup>1</sup> Chuan Jiang,<sup>1</sup> Yanrong Huang,<sup>3</sup> Genhe He,<sup>1,\*</sup> and Limin Liu<sup>4,\*</sup>

*1 Key Laboratory of Biodiversity and Ecological Engineering of Jiangxi Province, Jingtangshan University, Ji'an, Jiangxi 343009, China.*

*2 State Key Laboratory of Luminescent Materials & Devices, Guangdong Provincial Key Laboratory of Luminescence from Molecular Aggregates, College of Materials Science & Engineering, South China University of Technology, Guangzhou 510640, China*

*3 School of Food Science and Engineering, Guangdong Province Key Laboratory for Green Processing of Natural Products and Product Safety, South China University of Technology, Guangzhou 510640, China*

*4 School of Chemistry and Chemical Engineering, Jingtangshan University, Ji'an, Jiangxi 343009, China*

*\* Corresponding author. E-mail: [rs7lfxu@outlook.com](mailto:rs7lfxu@outlook.com)*

## Table of contents

|                 |    |
|-----------------|----|
| Scheme S1.....  | 1  |
| Fig. S1.....    | 1  |
| Fig. S2.....    | 2  |
| Fig. S3.....    | 3  |
| Fig. S4.....    | 4  |
| Fig. S5.....    | 5  |
| Fig. S6.....    | 6  |
| Fig. S7.....    | 7  |
| Fig. S8.....    | 8  |
| Fig. S9.....    | 9  |
| Table S1.....   | 10 |
| Table S2.....   | 12 |
| Table S3.....   | 12 |
| Table S4.....   | 12 |
| References..... | 13 |

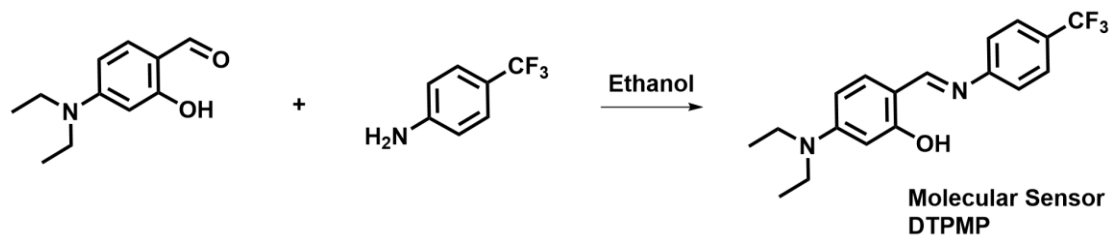

**Scheme S1.** Synthesis route of the molecular sensor DTPMP.

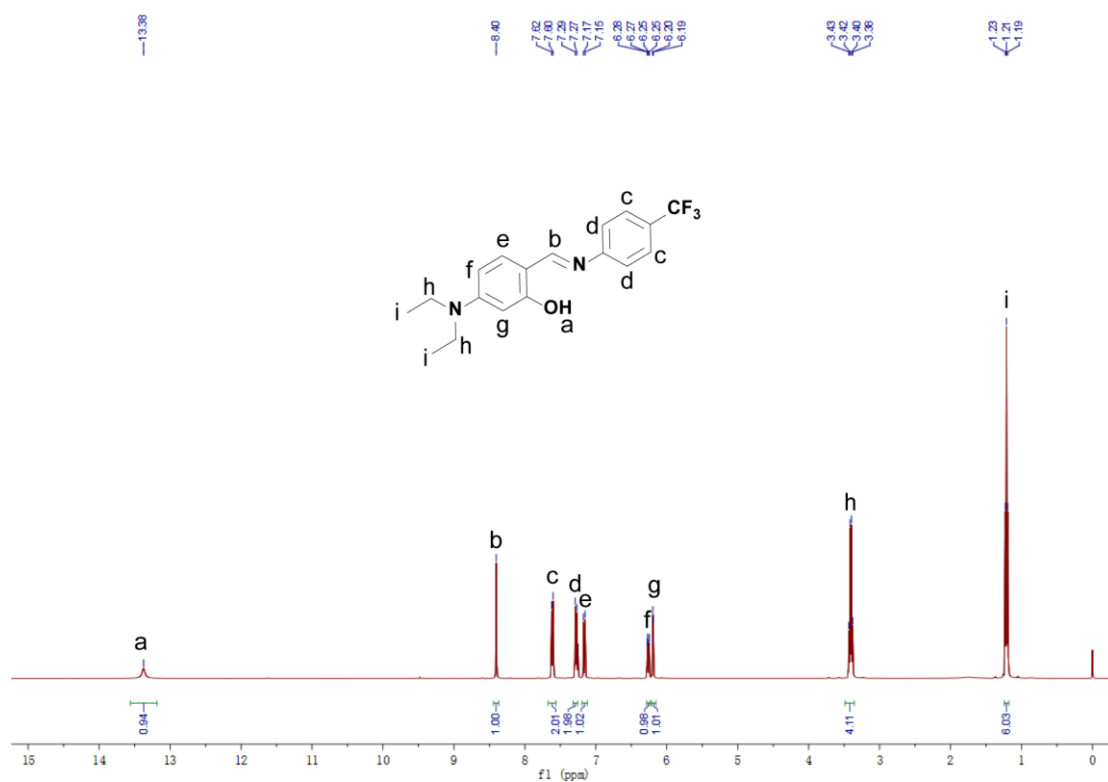

**Fig. S1**  $^1\text{H-NMR}$  spectrum of the molecular sensor DTPMP in  $\text{CDCl}_3$ .

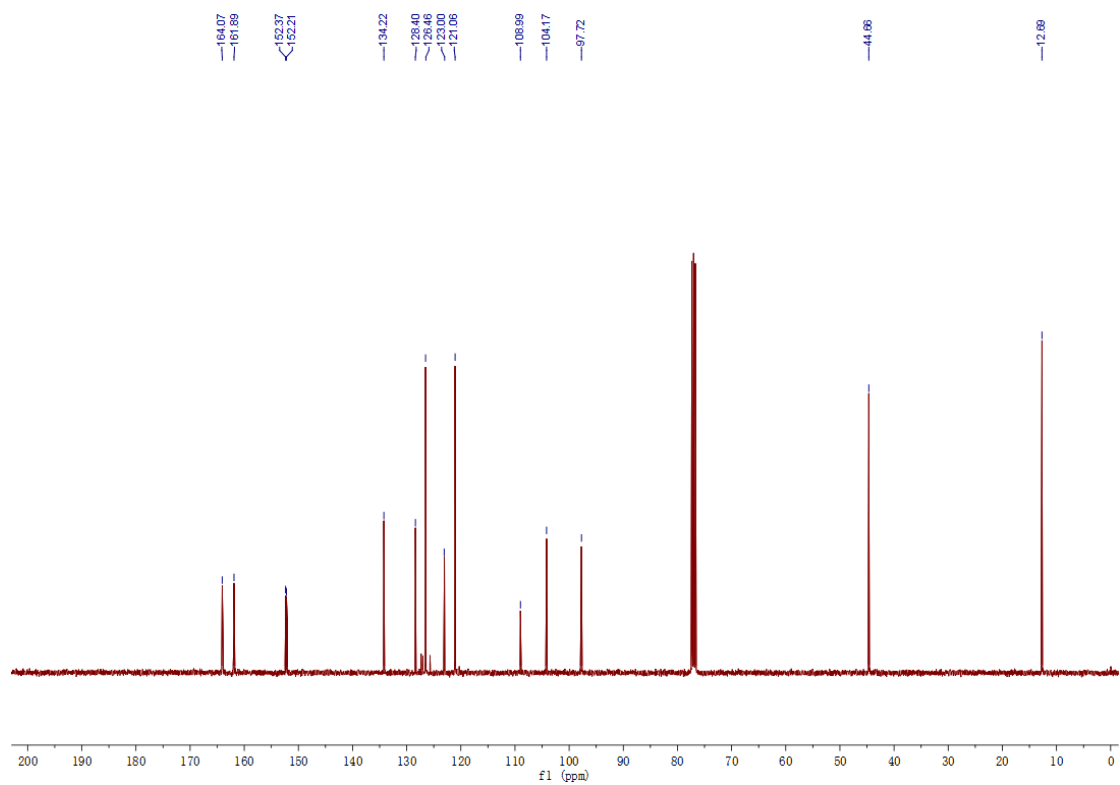

**Fig. S2**  $^{13}\text{C}$ -NMR spectrum of the molecular sensor DTPMP in  $\text{CDCl}_3$ .

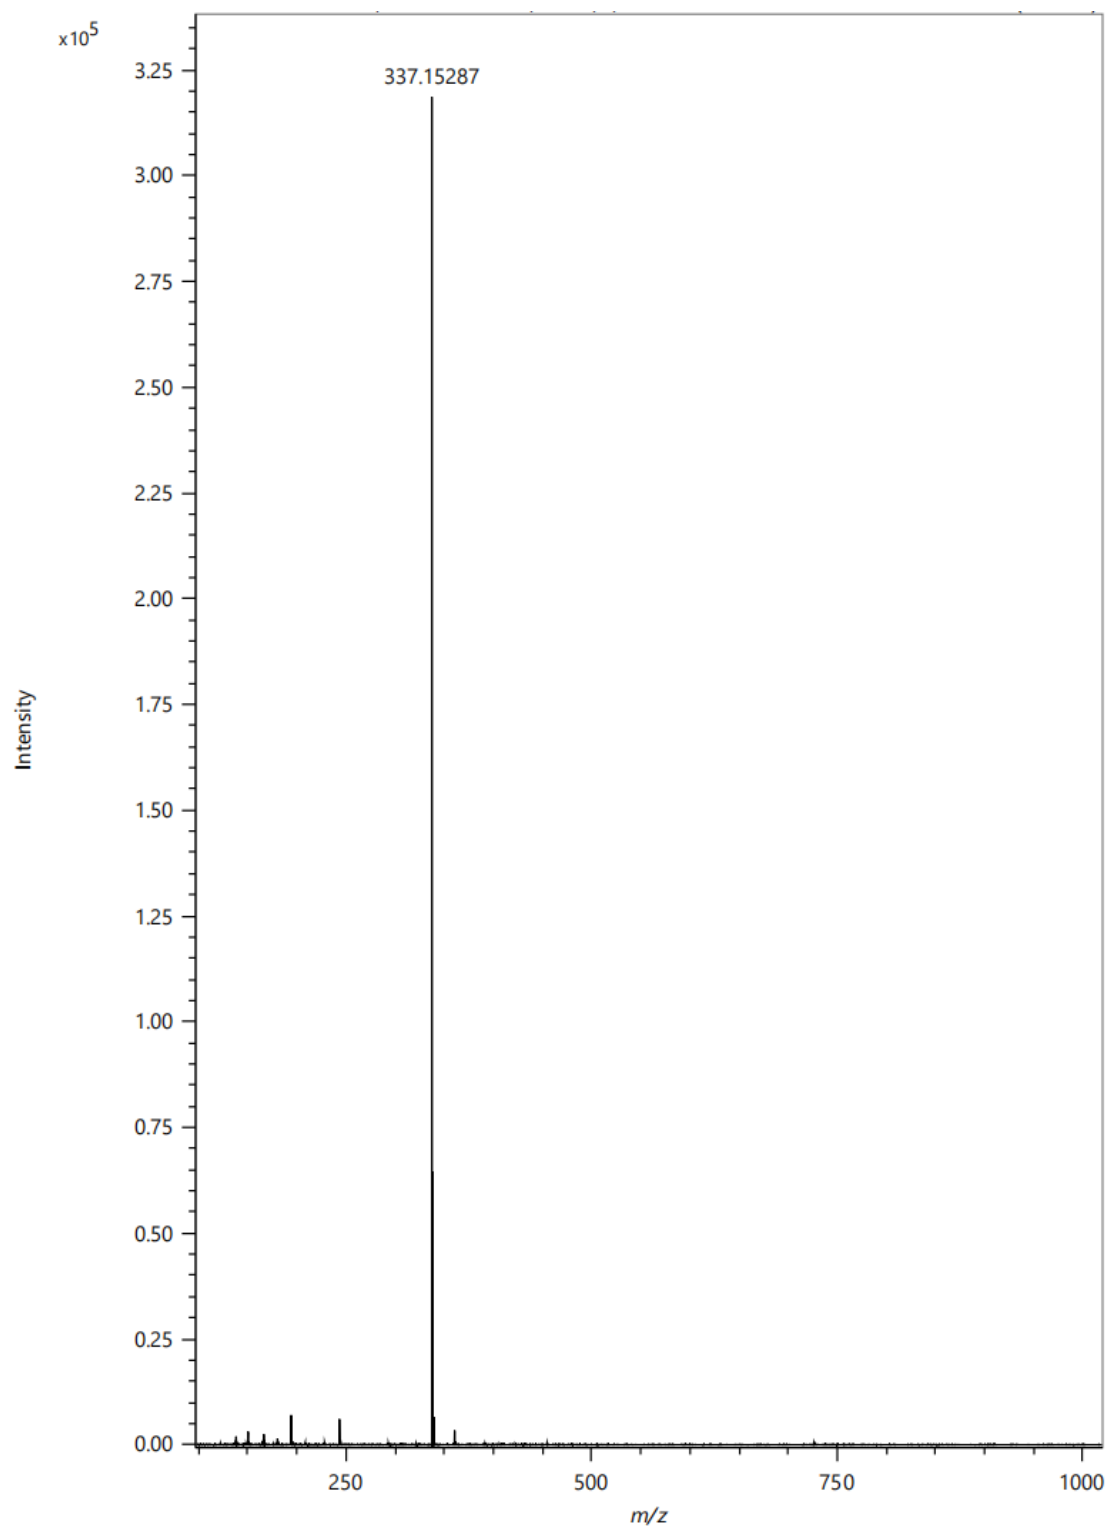

**Fig. S3** HR mass spectrum of the molecular sensor DTPMP. MS (ESI):  $m/z$  337.15287  
[M+1]<sup>+</sup>.

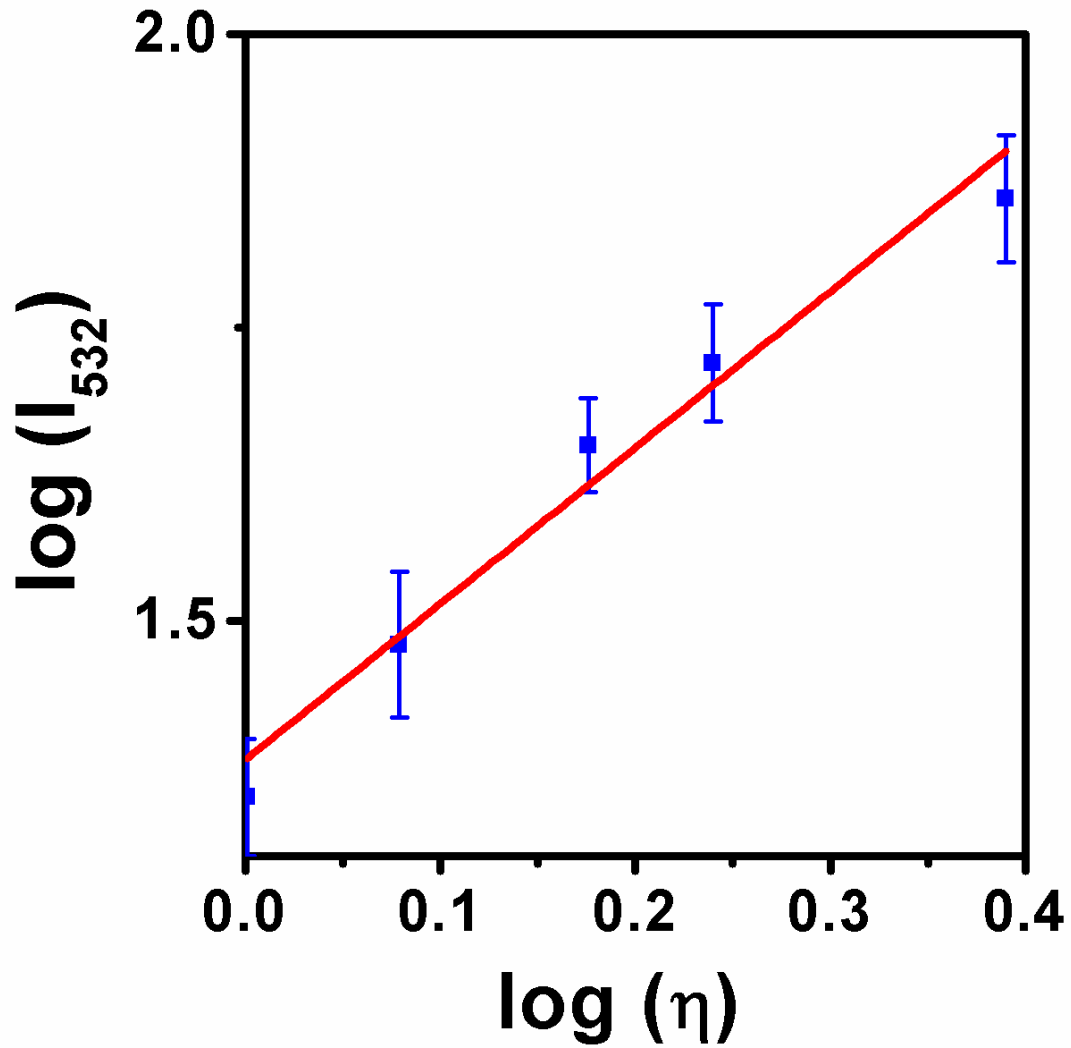

**Fig. S4** Detection limit of the sensor DTPMP.

The calibration curve was first obtained from the plot of  $\log (I_{532})$  as a function of  $\log (\eta)$ . Then the regression curve equation was obtained for the lower viscosity part.

The detection limit =  $3 \times S.D./k$

Where  $k$  is the slope of the curve equation, and  $S.D.$  represents the standard deviation for the  $\log (I_{532})$  of molecular sensor DTPMP.

$$\log (I_{532}) = 1.381 + 1.330 \times \log (\eta) \quad (R^2 = 0.982)$$

$$\log (\text{LOD}) = 3 \times 0.038 / 1.330 = 0.086$$

$$\text{LOD} = 10^{0.086} = 1.220 \text{ cP}$$

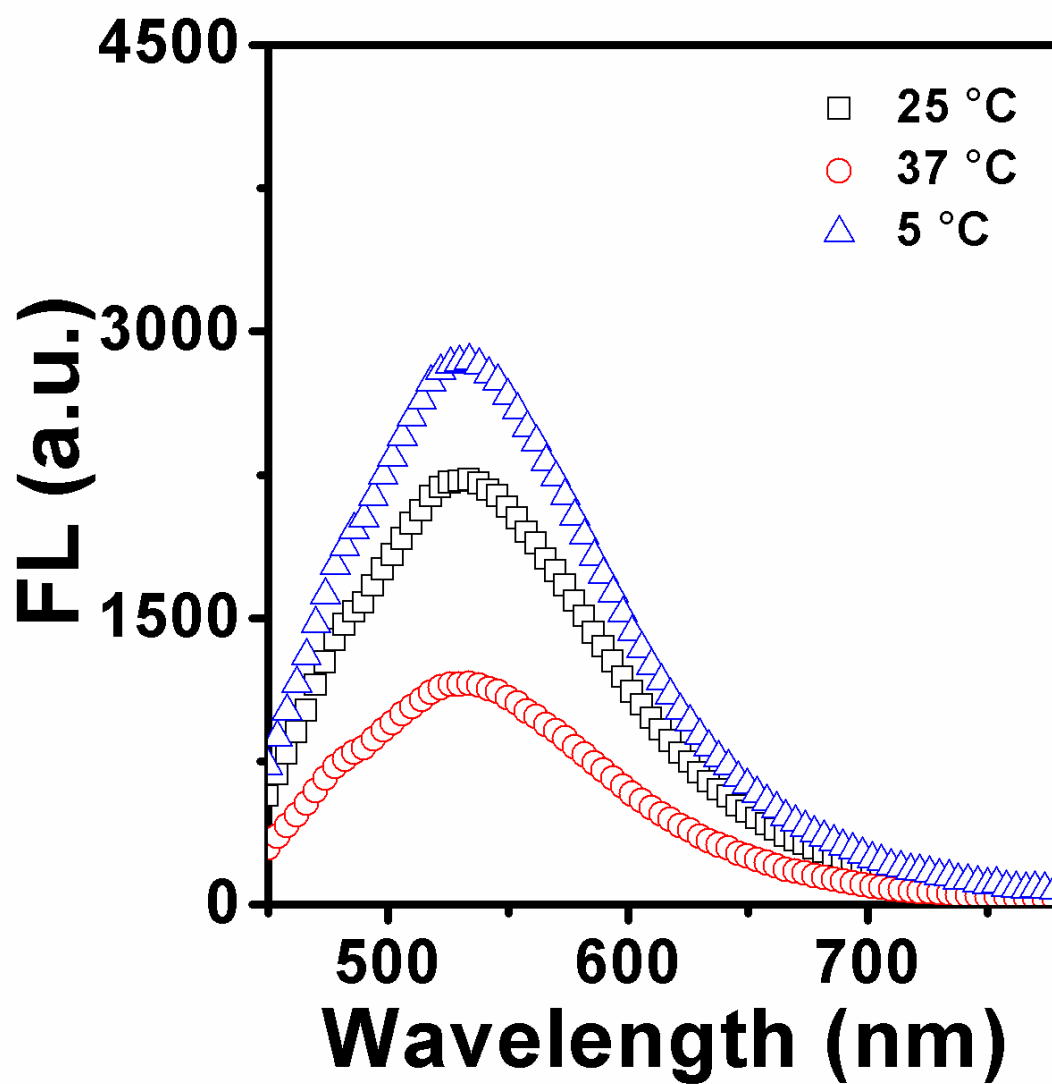

**Fig. S5** Fluorescence spectra of the sensor DTPMP (10  $\mu$ M) in glycerol under different temperature, including the ambient temperature (25 °C), normal body temperature (37 °C), and fresh-maintenance temperature (5 °C).

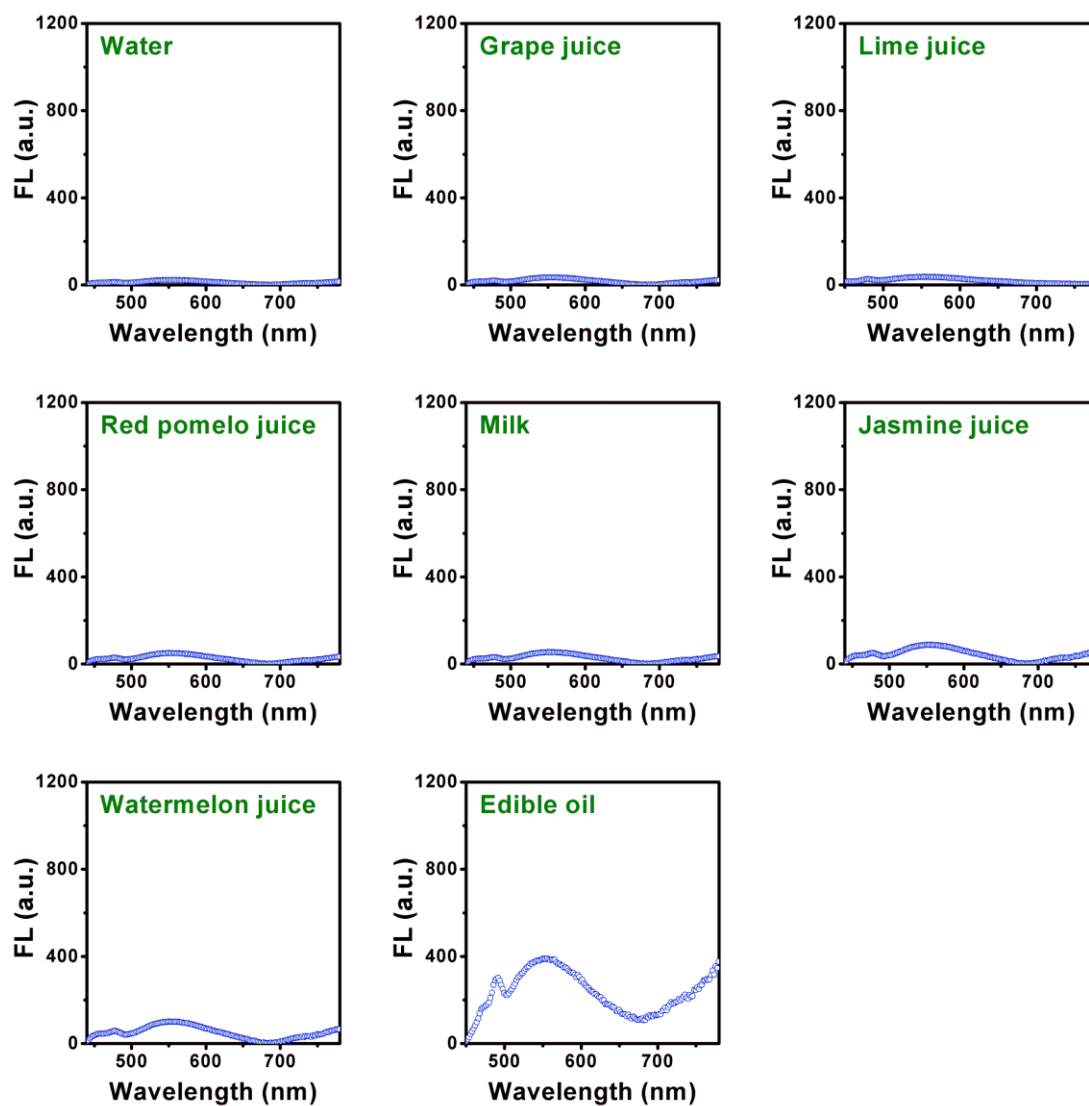

**Fig. S6** Fluorescence spectra of the molecular sensor DTPMP (10  $\mu$ M, containing 1% DMSO) in eight kinds of common liquids, including the water, grape juice, lime juice, red pomelo juice, milk, jasmine juice, watermelon juice and edible oil,  $\lambda_{\text{ex}}=420$  nm.



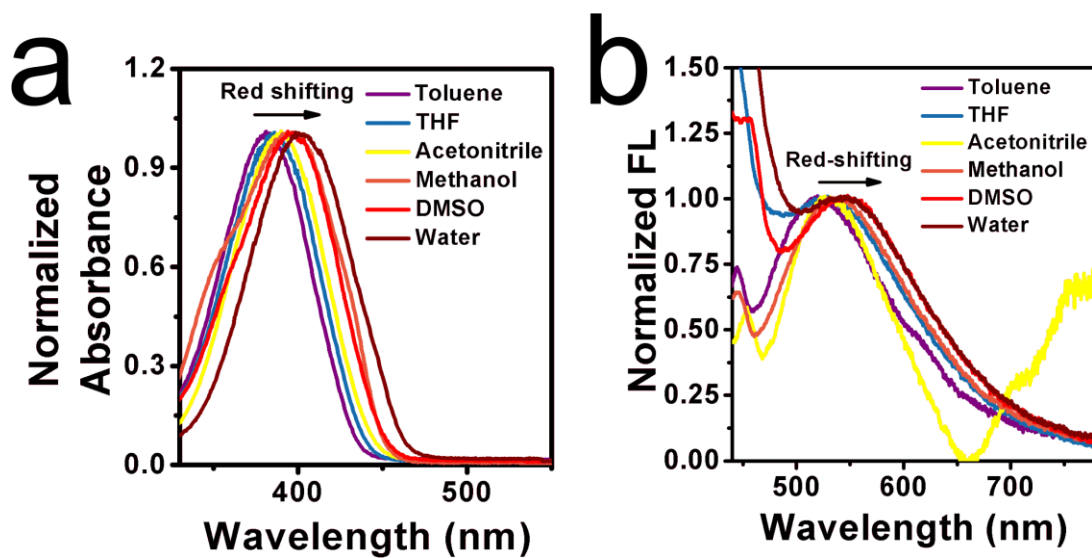

**Fig. S7** (a) Normalized fluorescence emission spectra of molecular sensor DTPMP in six kinds of common solvents. (b) Normalized absorption spectra of molecular sensor DTPMP in six kinds of common solvents.

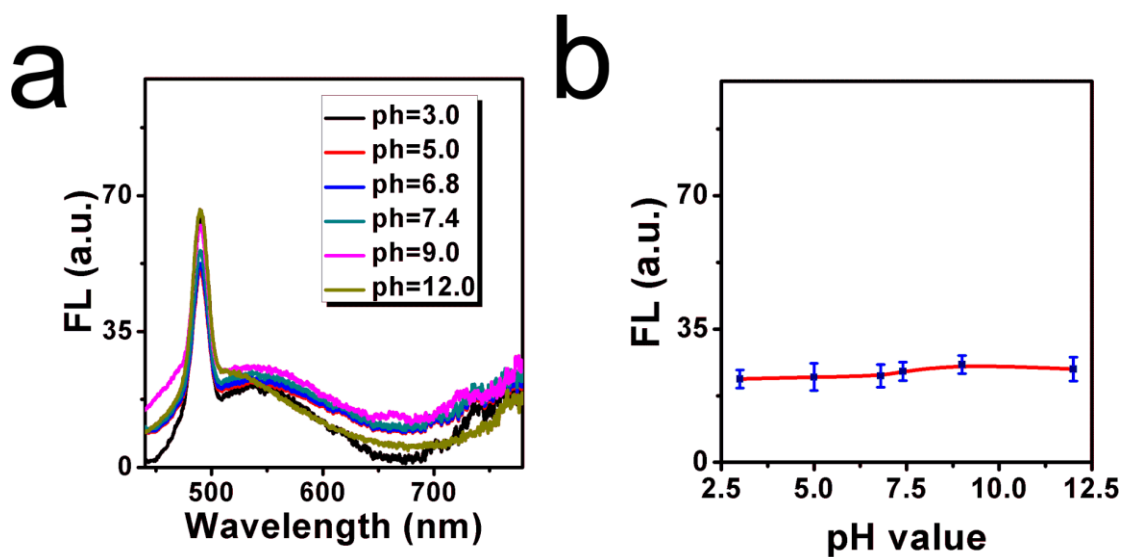

**Fig. S8** (a) Fluorescence emission spectra intensity of the molecular sensor DTPMP (10  $\mu$ M) under various pH values (containing 1% DMSO) in low viscous water. (b) Corresponding fluorescence intensities of molecular sensor DTPMP under various pH values environment,  $\lambda_{\text{ex}}=420$  nm.

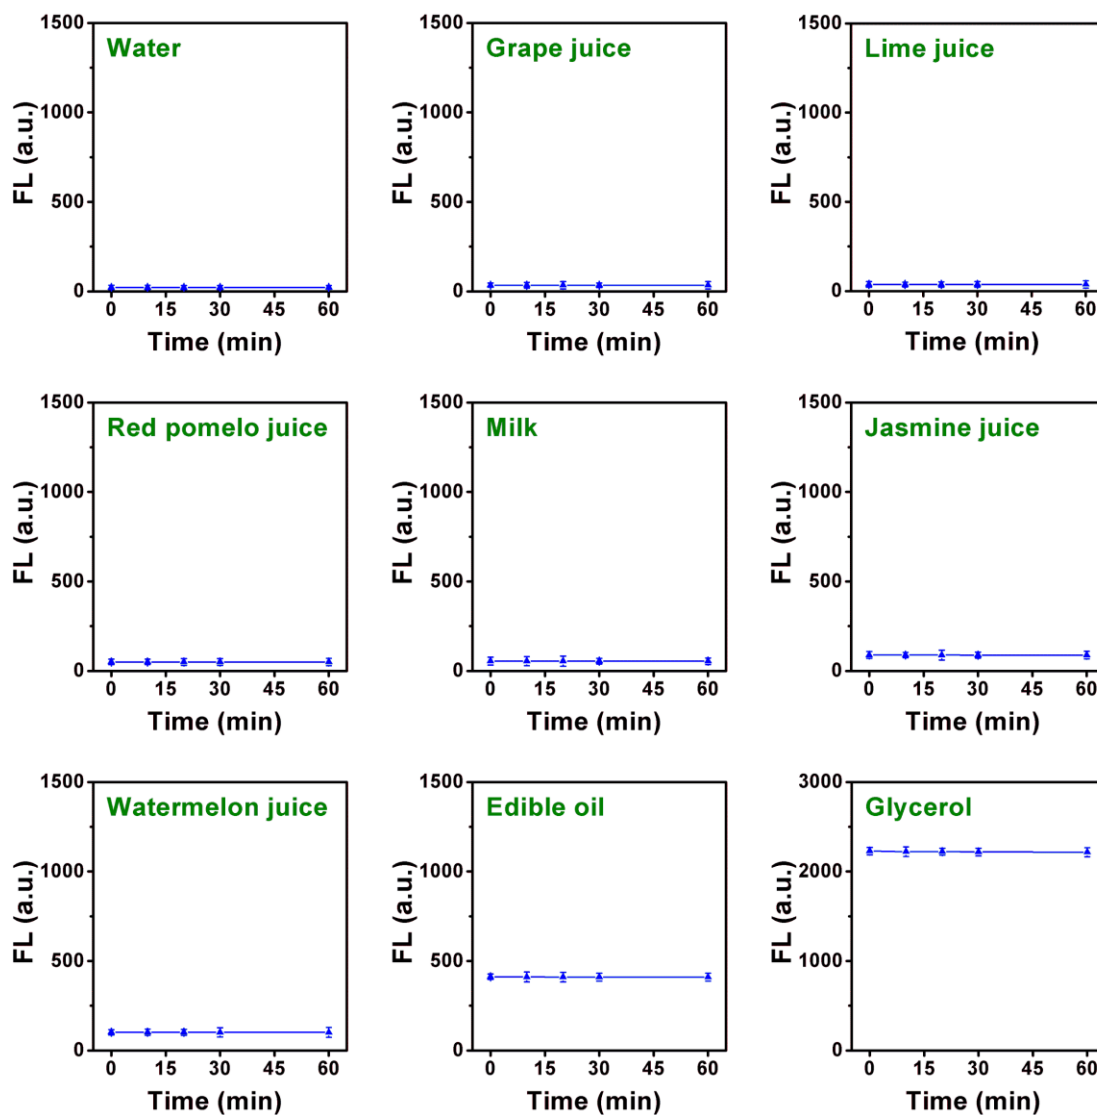

**Fig. S9** Photostability analysis of the molecular sensor DTPMP in water (containing 1% DMSO), glycerol (containing 1% DMSO) and other seven kinds of common liquids (containing 1% DMSO). All upon samples were tested under continuous light irradiation with 420 nm UV lamp.

**Table S1.** Comparison of the representative fluorescence-based probes for viscosity detection reported in recent years.

| Probe                                                                               | $\lambda_{ab}^*$ | $\lambda_{em}^{**}$ | Stokes shift <sup>***</sup> | Application                                 | Reference |
|-------------------------------------------------------------------------------------|------------------|---------------------|-----------------------------|---------------------------------------------|-----------|
| 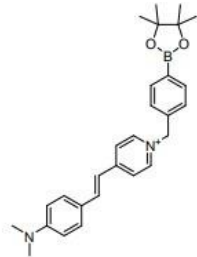   | 500 nm           | 607 nm              | 107 nm                      | Biological system, living cells.            | [1]       |
|    | 530 nm           | 620 nm              | 90 nm                       | Biological system, living cells.            | [2]       |
|   | 560 nm           | 580 nm              | 20 nm                       | Biological system, living cells.            | [3]       |
|  | 600 nm           | 635 nm              | 35 nm                       | Biological system, living cells, in vivo.   | [4]       |
|  | 580 nm           | 635 nm              | 55 nm                       | Biological system, living cells.            | [5]       |
|  | 678 nm           | 698 nm              | 20 nm                       | Biological system, living cells, rat slice. | [6]       |

|                                                                                     |          |          |          |                                                   |           |
|-------------------------------------------------------------------------------------|----------|----------|----------|---------------------------------------------------|-----------|
| 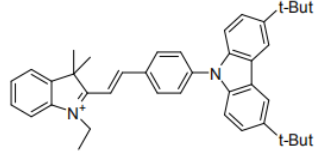   | 545 nm   | 628 nm   | 83 nm    | Biological system, living cells.                  | [7]       |
|    | 525 nm   | 595 nm   | 70 nm    | Biological system, living cell.                   | [8]       |
|    | 520 nm   | 610 nm   | 90 nm    | Biological system, living cell, zebra fish, mice. | [9]       |
|   | 470 nm   | 560 nm   | 90 nm    | Biological system, living cell.                   | [10]      |
|  | 520 nm   | 580 nm   | 60 nm    | Biological system, living cell.                   | [11]      |
|  | 415.6 nm | 532.4 nm | 116.8 nm | Liquids, food spoilage analysis.                  | This work |

\* Absorption peak. The absorption was measured in the glycerol.

\*\* Emission peak. The fluorescence emission was measured in the glycerol.

\*\*\* The Stokes shift herein was obtained from the absorption and emission measured in the glycerol.

**Table S2.** Fluorescence intensity of commercial liquids with the molecular sensor DTPMP.

| Liquids          | Fluorescence intensity |
|------------------|------------------------|
| Water            | 22.50                  |
| Grape juice      | 34.80                  |
| Lime juice       | 37.50                  |
| Red pomelo juice | 50.75                  |
| Watermelon juice | 102.14                 |
| Milk             | 55.10                  |
| Jasmine juice    | 89.13                  |
| Edible oil       | 412.10                 |

**Table S3.** Viscosity values of the liquids determined *via* viscometer and fluorescence technique.

| Liquids          | Viscosity (cP) | Calculated (cP) |
|------------------|----------------|-----------------|
| Water            | 1.00           | 1.02            |
| Grape juice      | 1.36           | 1.34            |
| Lime juice       | 1.42           | 1.44            |
| Red pomelo juice | 2.44           | 2.47            |
| Watermelon juice | 7.50           | 7.40            |
| Milk             | 2.81           | 2.86            |
| Jasmine juice    | 6.00           | 6.09            |
| Edible oil       | 68.10          | 68.25           |

**Table S4.** Photo-physical properties of the molecular sensor DTPMP in different solvents.

| Solvents      | Dielectric constant ( $\epsilon$ ) | $\eta$ (cP) | Absorption $\lambda_{ab}$ (nm) | Emission $\lambda_{em}$ (nm) |
|---------------|------------------------------------|-------------|--------------------------------|------------------------------|
| Water         | 78.5                               | 1.0         | 401.2                          | 543.7                        |
| Acetonitrile  | 37.5                               | 0.4         | 388.6                          | 527.1                        |
| DMSO          | 46.8                               | 2.1         | 396.8                          | 541.1                        |
| Methanol      | 32.6                               | 0.6         | 395.5                          | 530.4                        |
| THF           | 7.4                                | 0.5         | 384.5                          | 521.2                        |
| Toluene       | 2.4                                | 0.6         | 381.1                          | 518.3                        |
| Ethyl acetate | 7.3                                | 0.4         | 385.3                          | 523.8                        |
| Glycerol      | 45.8                               | 956.0       | 415.6                          | 532.4                        |

## References

- 1 M. Ren, B. Deng, K. Zhou, X. Kong, J.-Y. Wang and W. Lin, Single fluorescent probe for dual-imaging viscosity and H<sub>2</sub>O<sub>2</sub> in mitochondria with different fluorescence signals in living cells, *Anal. Chem.*, 2017, **89**, 552–555.
- 2 G. Zhang, Y. Sun, X. He, W. Zhang, M. Tian, R. Feng, R. Zhang, X. Li, L. Guo, X. Yu and S. Zhang, Red-emitting mitochondrial probe with ultrahigh signal-to-noise ratio enables high-fidelity fluorescent images in two-photon microscopy, *Anal. Chem.*, 2015, **87**, 12088–12095.
- 3 L.-L. Li, K. Li, M.-Y. Li, L. Shi, Y.-H. Liu, H. Zhang, S.-L. Pan, N. Wang, Q. Zhou and X.-Q. Yu, BODIPY-based two-photon fluorescent probe for real-time monitoring of lysosomal viscosity with fluorescence lifetime imaging microscopy, *Anal. Chem.*, 2018, **90**, 5873–5878.
- 4 M. Ren, L. Wang, X. Lv, J. Liu, H. Chen, J. Wang and W. Guo, Development of a benzothiazole-functionalized red-emission pyronin dye and its dihydro derivative for imaging lysosomal viscosity and tracking endogenous peroxynitrite, *J. Mater. Chem. B*, 2019, **7**, 6181–6186.
- 5 L. Zhu, M. Fu, B. Yin, L. Wang, Y. Chen and Q. Zhu, A red-emitting fluorescent probe for mitochondria-target microviscosity in living cells and blood viscosity detection in hyperglycemia mice, *Dye. Pigment.*, 2020, **172**, 107859.
- 6 S. J. Park, B. K. Shin, H. W. Lee, J. M. Song, J. T. Je and H. M. Kim, Asymmetric cyanine as a far-red fluorescence probe for mitochondrial viscosity, *Dye. Pigment.*, 2020, **174**, 108080.
- 7 K. Zhou, M. Ren, B. Deng and W. Lin, Development of a viscosity sensitive fluorescent probe for real-time monitoring of mitochondria viscosity, *New J. Chem.*, 2017, **41**, 11507–11511.
- 8 Y. Baek, S. J. Park, X. Zhou, G. Kim, H. M. Kim and J. Yoon, A viscosity sensitive fluorescent dye for real-time monitoring of mitochondria transport in neurons, *Biosens. Bioelectron.*, 2016, **86**, 885–891.
- 9 J. Yin, M. Peng and W. Lin, Visualization of mitochondrial viscosity in inflammation, fatty liver, and cancer living mice by a robust fluorescent probe *Anal. Chem.*, 2019, **91**, 8415–8421.
- 10 Z. Zou, Q. Yan, S. Ai, P. Qi, H. Yang, Y. Zhang, Z. Qing, L. Zhang, F. Feng and R. Yang, Real-time visualizing mitophagy-specific viscosity dynamic by mitochondria-anchored molecular sensor, *Anal. Chem.*, 2019, **91**, 8574–8581.
- 11 L. He, Y. Yang and W. Lin, Rational design of a rigid fluorophore–molecular sensor-based probe for high signal-to-background ratio detection of sulfur dioxide in viscous system, *Anal. Chem.*, 2019, **91**, 15220–15228.
